# Supplementary material for: An assessment system for clinical and biological interpretability in ulcerative colitis
Source: publisher site journal article supplement (doi:10.18632/aging.205564), 2024-02-16
Supplement: Supplementary file [file aging-v16i4-205564-supplementary-material-SD1.pdf]

## SUPPLEMENTARY FIGURES

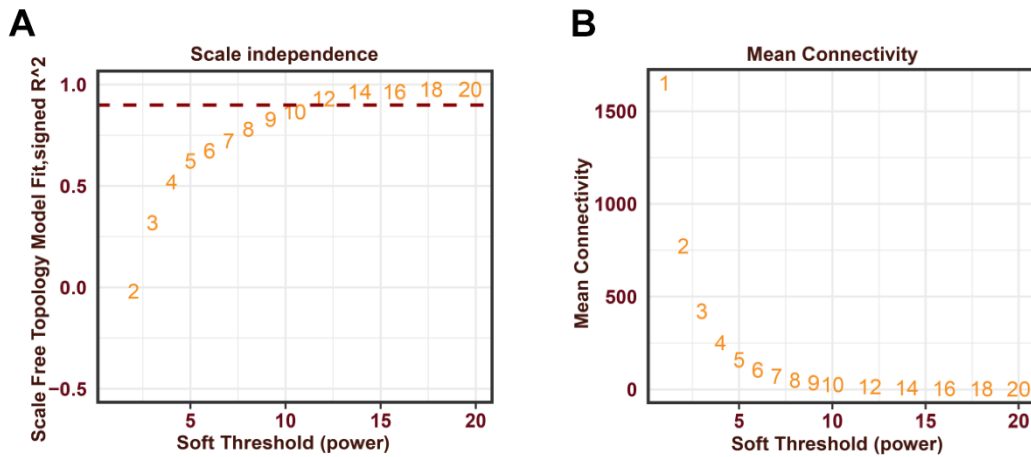

**Supplementary Figure 1. Determine the optimal soft threshold for WGCNA independence index and average connectivity.** (A) Estimation of the scale independence index of the 1–20 soft threshold power ( $\beta = 14$ ). (B) Determination of the mean connectivity of the 1–20 soft threshold power.

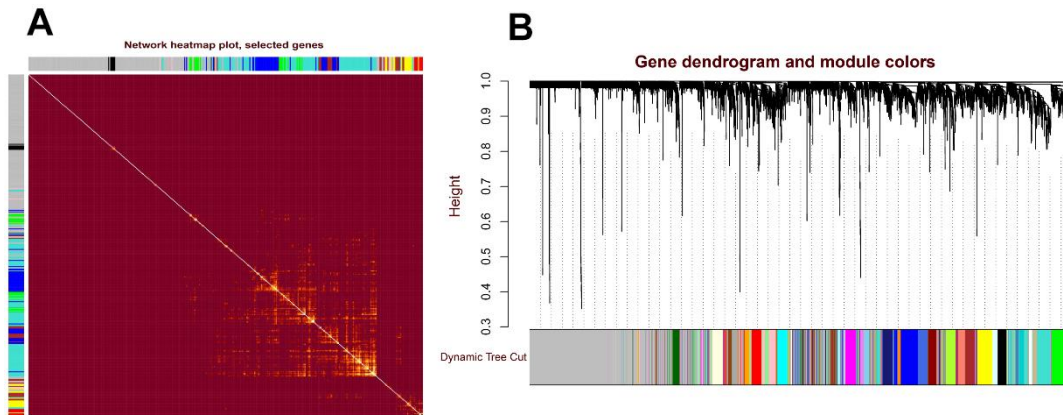

**Supplementary Figure 2. Weighted gene co-expression analysis (WGCNA) based on the common DEGs.** (A) Heatmap depicting the topological overlap matrix among all genes in WGCNA. (B) Gene clustering diagram based on hierarchical clustering under optimal soft-thresholding power as 14. Genes with similar expression patterns were assigned to co-expression modules represented by the same color.

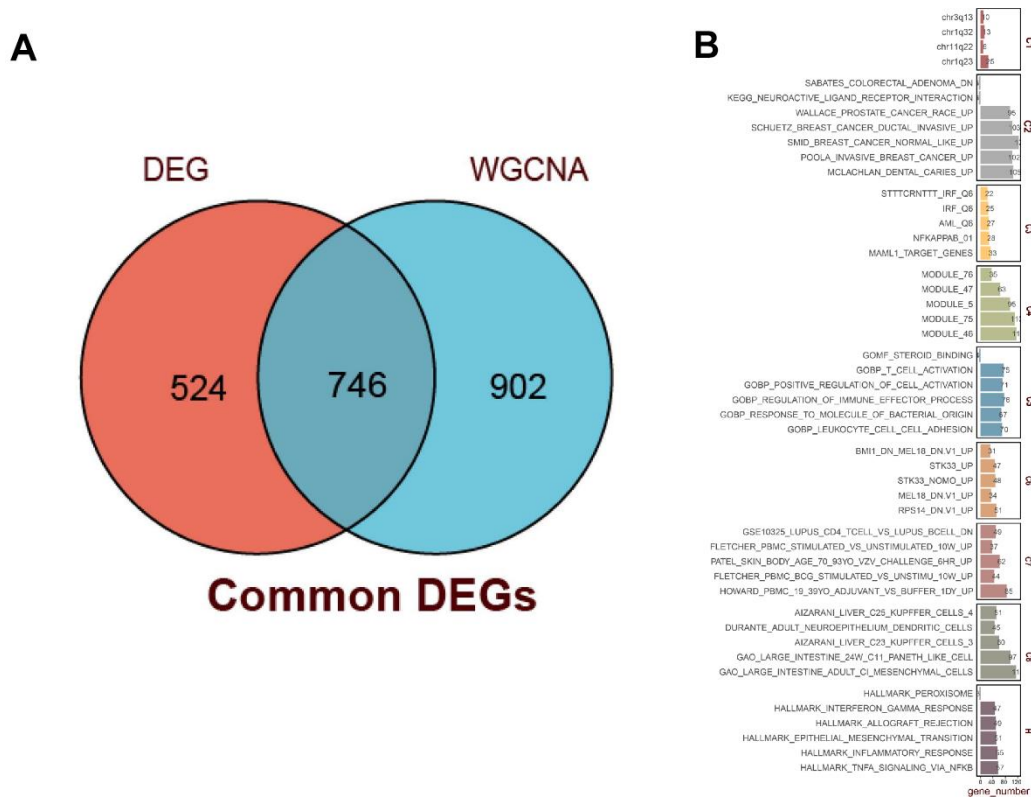

**Supplementary Figure 3. Uncovering dysregulated gene co-expression pattern and ORA analysis.** (A) Venn diagram showing co-expressed genes in DEGs and WGCNA modules. (B) The barplot shows up-and-down-regulated genes in common DEGs by ORA based on the C1-C8 and Hallmark datasets obtained from MsigDB database.

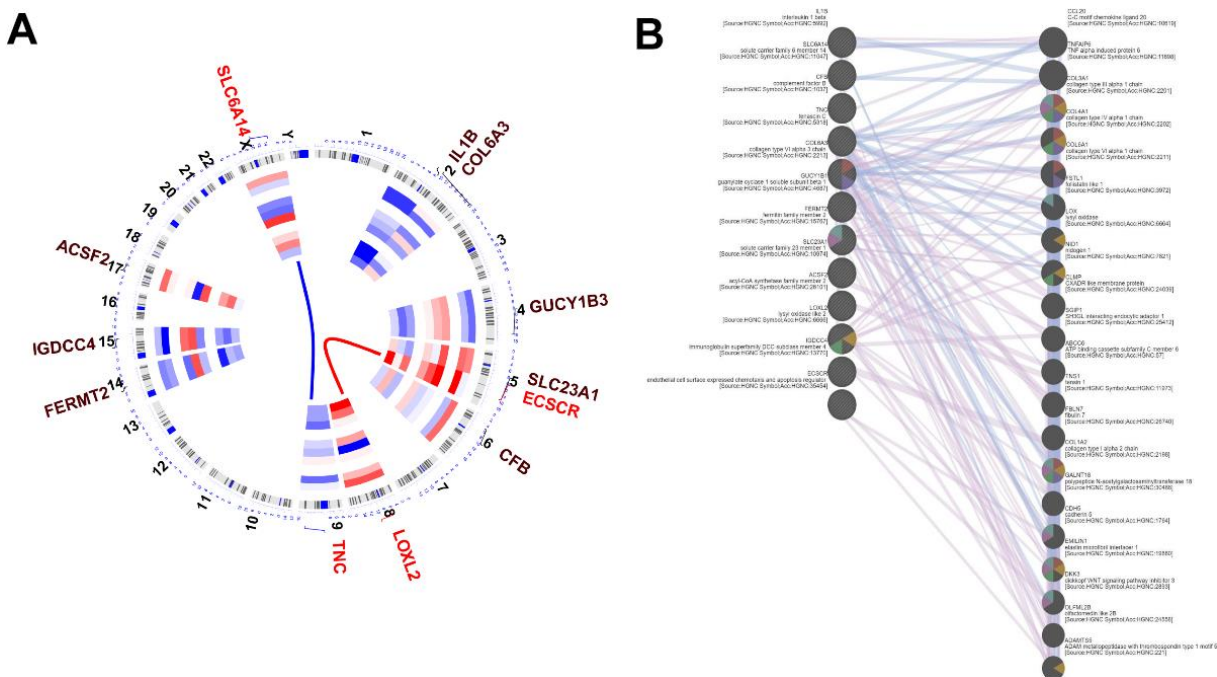

**Supplementary Figure 4. Chromosome location and genetic interactions of UCRGs.** (A) Identify the chromosome location of UCRGs. (B) Genetic interaction and co-expression patterns about UCRGs.

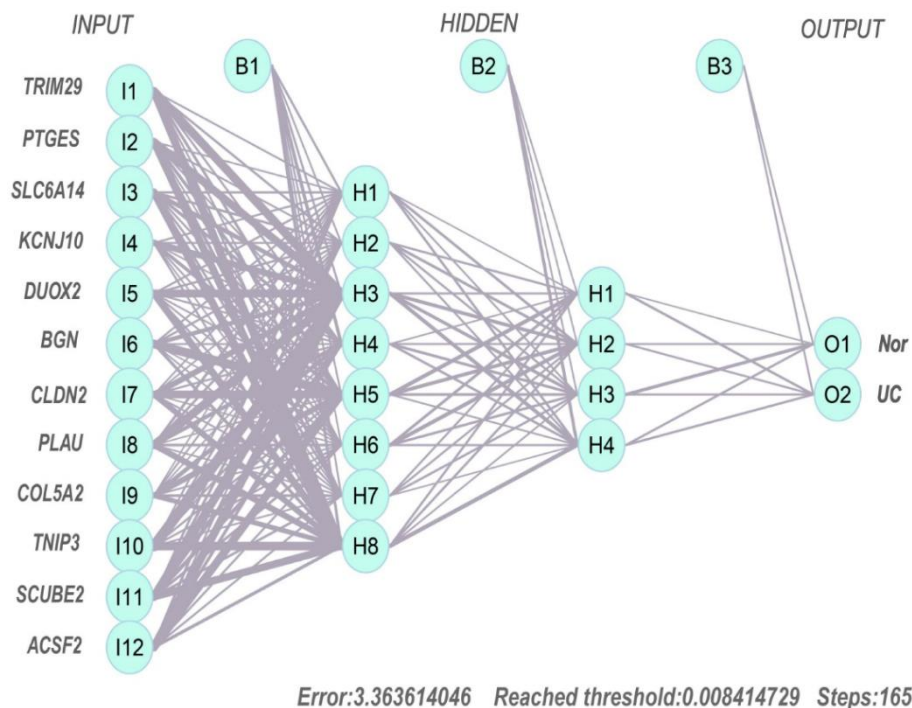

**Supplementary Figure 5. Results of neural network visualization.** Visualization of UCRGs classifier: A neural network was trained from UCRGs using backpropagation for patient diagnosis.

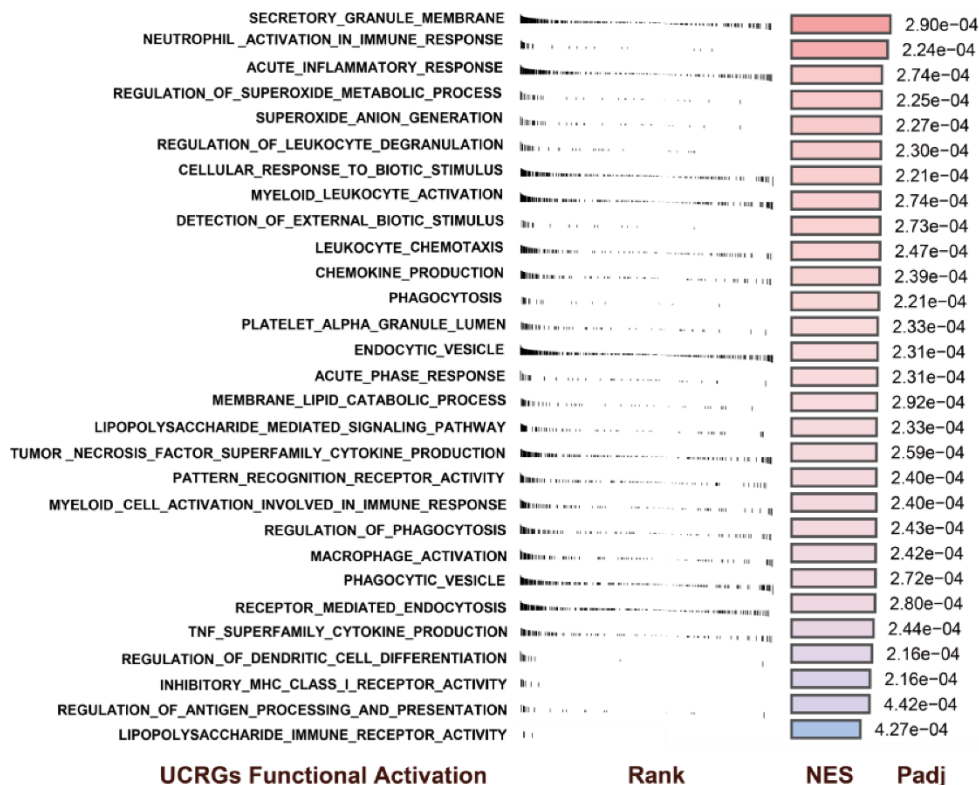

**Supplementary Figure 6. GSEA analysis of biological process pathway of UCRGs.** GSEA estimates differences in biological pathway activity of UCRGs.
